# Supplementary material for: Comparing photosynthetic characteristics of Isoetes sinensis Palmer under submerged and terrestrial conditions
Source: PubMed Central journal article supplement (PMC4669503; doi:10.1038/srep17783), 2015-12-04
Supplement: srep17783-s1.pdf [file srep17783-s1.pdf]

# Comparing photosynthetic characteristics of *Isoetes sinensis* Palmer under submerged and terrestrial conditions

Tao Yang <sup>1</sup>, Xing Liu <sup>1,\*</sup>

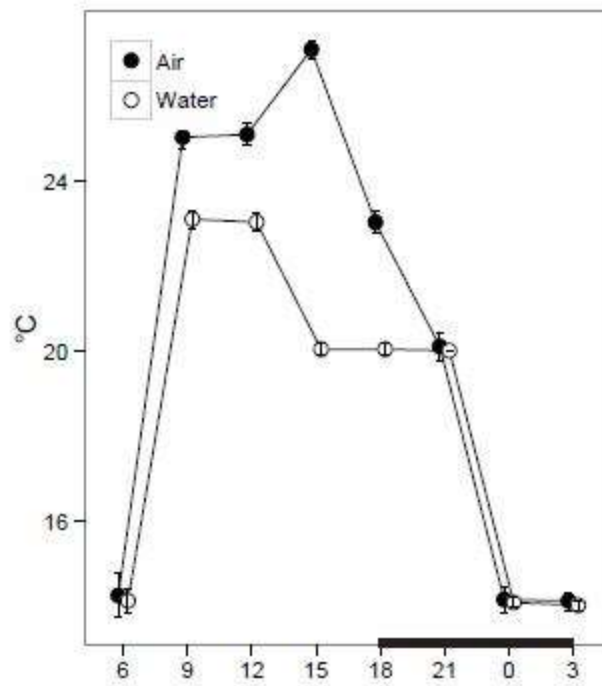

**Supplementary Figure S1.** Diurnal fluctuation of the temperatures in water and air.

Temperatures in water and air were recorded during the daytime (white) and night (black), respectively.

Each point represents the mean  $\pm$  SE (n=3).

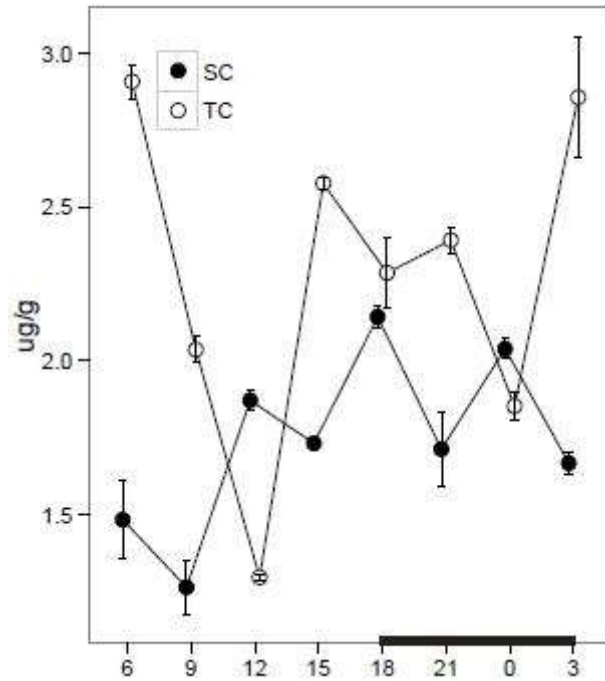

**Supplementary Figure S2.** Diurnal fluctuation of the levels of soluble protein under submerged (SC) and terrestrial conditions (TC).

Juvenile and green leaves were harvested every three hours during the daytime (white) and night (black), under TC and SC, respectively. Each point represents the mean  $\pm$  SE (n=3).

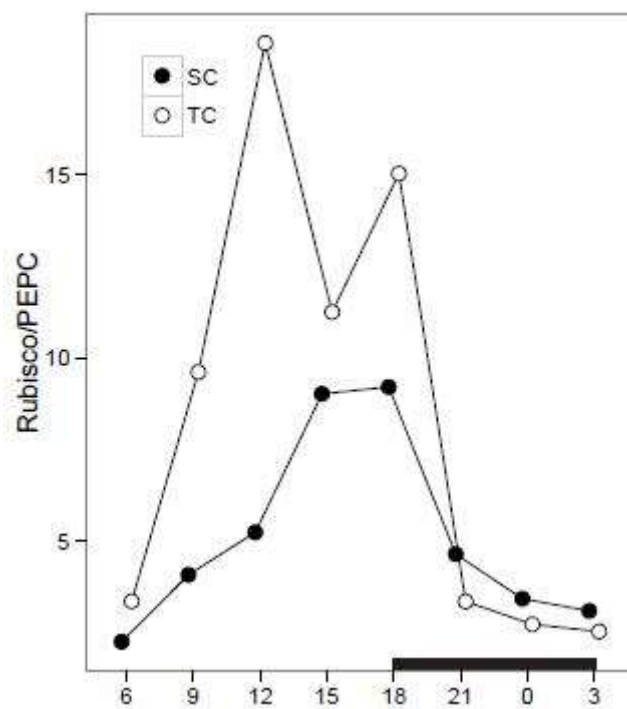

**Supplementary Figure S3.** Ratios of Rubisico and PEPC activity over a diurnal cycle under submerged (SC) and terrestrial conditions (TC).

Juvenile and green leaves were harvested every three hours during the daytime (white) and night (black), under TC and SC, respectively.

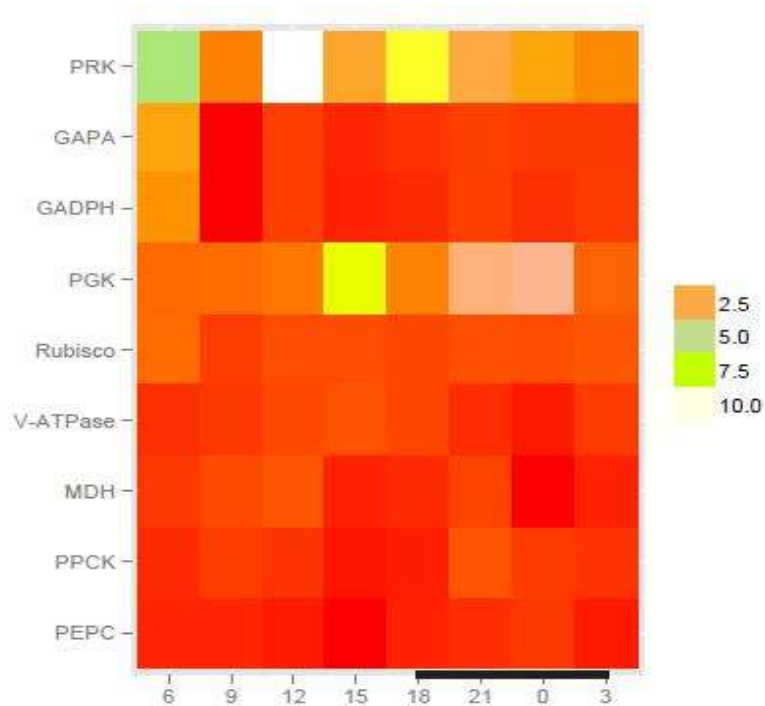

**Supplementary Figure S4.** Dynamic plot about the relative expression levels of nine photosynthetic genes under TC.

Juvenile and green leaves were harvested every three hours during the daytime (white) and night (black), respectively. Nine genes were associated with CAM photosynthesis, including *PEPC*, *PPCK* and *MDH* for CAM mode; *Rubisco*, *GADPH*, *GAPA*, *PRK* and *PGK* for  $C_3$  mode; and *V-ATPase* associated with malic acid accumulation via the electrochemical channel of tonoplast. The legend in the right represents the relative expression levels and describes with different colors.

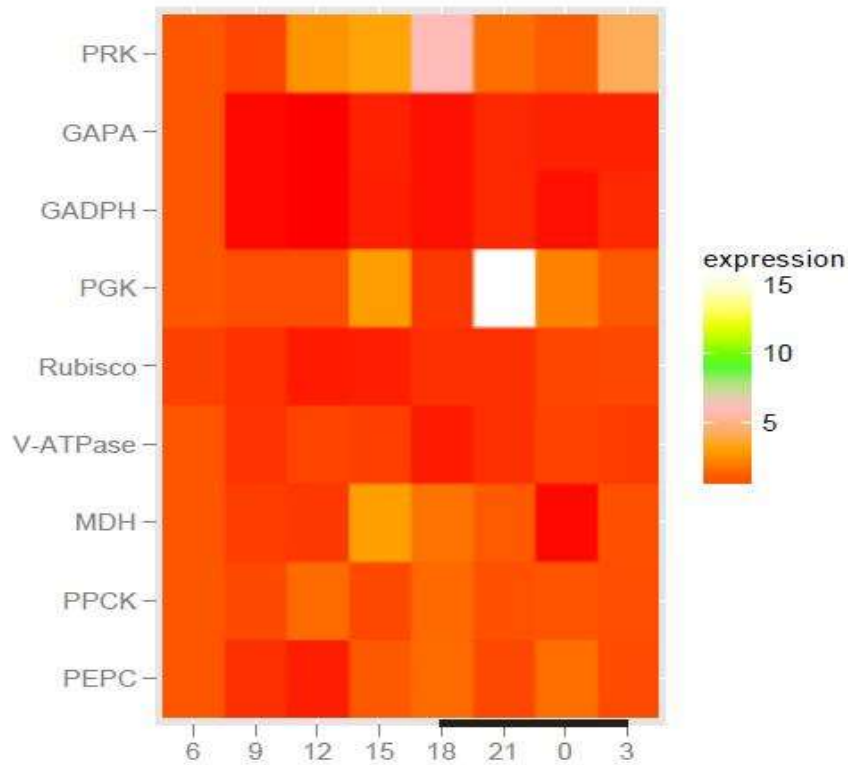

**Supplementary Figure S5.** Dynamic plot about the relative expression levels of nine photosynthetic genes under SC.

Juvenile and green leaves were harvested every three hours during the daytime (white) and night (black), respectively. Nine genes were associated with CAM photosynthesis, including *PEPC*, *PPCK* and *MDH* for CAM mode; *Rubisco*, *GADPH*, *GAPA*, *PRK* and *PGK* for  $C_3$  mode; and *V-ATPase* associated with malic acid accumulation via the electrochemical channel of tonoplast. The legend in the right represents the relative expression levels and describes with different colors.

| Genes           | Forward primers       | Reverse primers        | Annealing temperatures<br>(°C) | Annotations                                      |
|-----------------|-----------------------|------------------------|--------------------------------|--------------------------------------------------|
| <i>PEPC</i>     | CAGTAGGAGGGTCCGGTCA   | TGTTGCCTTGATGGGGACA    | 60                             | Phosphoenolpyruvate carboxylase                  |
| <i>PPCK</i>     | TACATTGTCTGAGCAAGGGTG | CAGGTTTCTGTCCGAGGC     | 60                             | Phosphoenolpyruvate carboxylase kinase           |
| <i>MDH</i>      | TCCCTTCTTCCTTGAGC     | CAGATGGGTCCTATGGTGT    | 54                             | Malic acid dehydrogenase                         |
| <i>Rubisco</i>  | CCAATGATGCGAACGAAG    | GCCCTGGATACTATGATGGAC  | 54                             | Ribulose-1, 5-carboxylase                        |
| <i>PGK</i>      | CAGTTGTACGGAATTGAGG   | AAGAAGGGAAGATTATGGA    | 57                             | Phosphoglycerate kinase                          |
| <i>GADPH</i>    | ACCACCAAATCTACAACCG   | ACCAACATCTACAGGAGCAG   | 54                             | glyceraldehyde 3-phosphate dehydrogenase         |
| <i>GAPA</i>     | GGCAAAGGTCTTCTCTCGG   | TCGGCATCGTCAAGGGTCT    | 52                             | glyceraldehyde-3-phosphate dehydrogenase (NADP+) |
| <i>PRK</i>      | GTACGCCGACATGACCATT   | GGGTCCGTAGAAGAACTTGATT | 54                             | Phosphoribulokinase                              |
| <i>V-ATPase</i> | GGTGCTGCGATGATGAAC    | CCATCAATCCTGCTGTTTC    | 57                             | H <sup>+</sup> -translocation ATPase             |
| <i>actin</i>    | TCCTCTCCAGCCTTCTTT    | TTCCTCCACTGAGCACAATA   | 52 to 60                       | actin                                            |

**Supplementary Table S1.** Primers' information for qPCR analysis

Nine genes were associated with CAM photosynthesis, including *PEPC*, *PPCK* and *MDH* for CAM mode; *Rubisco*, *GADPH*, *GAPA*, *PRK* and *PGK* for C<sub>3</sub> mode; and *V-ATPase* associated with the malic acid accumulation via an electrochemical channel of tonoplast. The *actin* gene acts as an internal control in this study.
